# Supplementary material for: Improving the dielectric properties of poly(vinylidene fluoride) composites by using poly(vinyl pyrrolidone)-encapsulated polyaniline nanorods
Source: Royal Society of Chemistry journal article supplement (doi:10.1039/c5tc04026d), 2016-01-01

## Supporting Information

Improving dielectric properties of poly(vinylidene fluoride)  
composites induced by poly(vinyl pyrrolidone)-encapsulated  
polyaniline nanorods

Shuangmin Yu, Fan Qin, Gengchao Wang\*

*Key Laboratory for Ultrafine Materials of Ministry of Education, Shanghai Key Laboratory  
of Advanced Polymeric Materials, School of Materials Science and Engineering, East China  
University of Science and Technology, Shanghai 200237, P.R.China*

**Fig. S1** Schematic diagrams of the dispersion of dPANI@PVP and dPANI in PVDF matrix,  
respectively.

\* Corresponding author: Tel.: +86 21 64253527

E-mail address: gengchaow@ecust.edu.cn (G.-C. Wang).

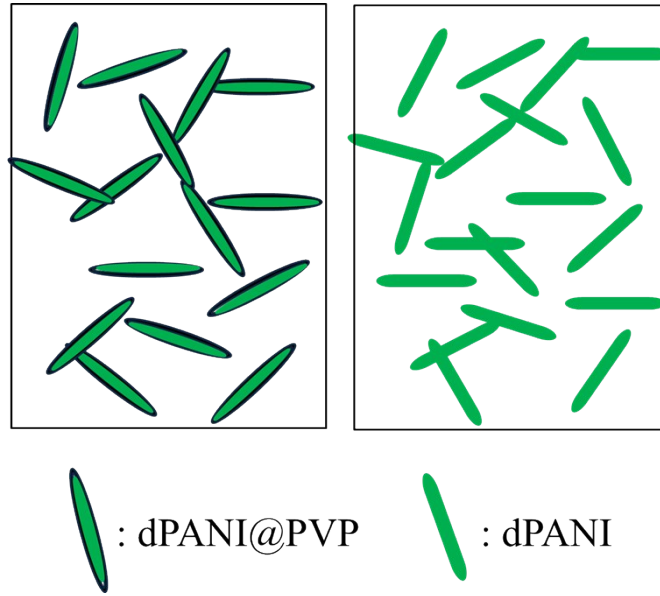

**Fig. S2** FE-SEM images of freeze-fractured cross-section of *dPANI@PVP/PVDF* nanocomposite films containing different *dPANI@PVP* content: (a) 6.5 wt% ( $\times 6k$ ), (b) 6.5 wt%

( $\times 30k$ ), (c) 9.5 wt% ( $\times 6k$ ), and (d) 9.5 wt% ( $\times 30k$ ).

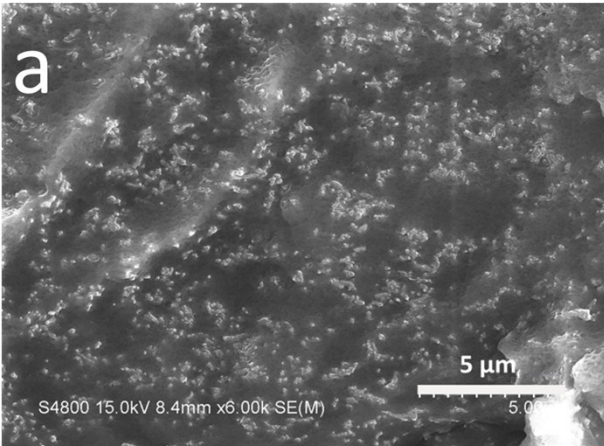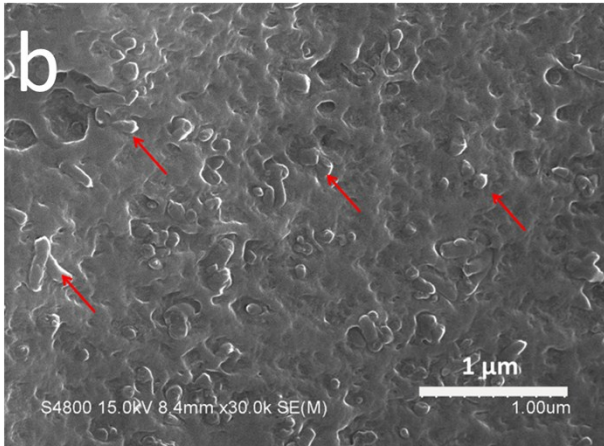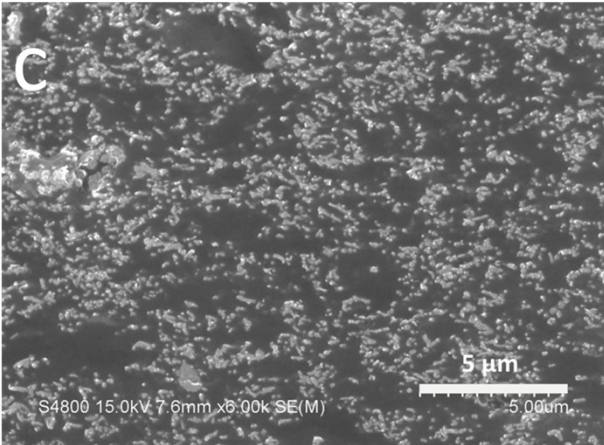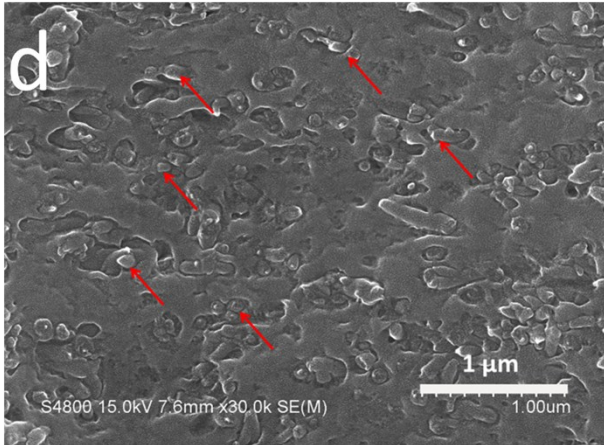

Supplement: c5tc04026d1.pdf [file c5tc04026d1.pdf]
